# Supplementary material
Source: Elsevier journal article supplement (http://library.osu.edu/projects/msa/suppmat/v256.i1.pp163-168/mmc1.pdf)
Supplement: mmc1 [file mmc1.pdf]

Table S1

Observed transition frequencies (MHz) of  $^{13}\text{C}$  and  $d_3$  species for *cis*-acetyl isocyanate in the ground vibrational state

| Transition |        |        |       |         |         | $^{13}\text{CH}_3\text{C}(\text{O})\text{NCO}$ |                    |                    |          | $\text{CD}_3\text{C}(\text{O})\text{NCO}$ |          |                    |
|------------|--------|--------|-------|---------|---------|------------------------------------------------|--------------------|--------------------|----------|-------------------------------------------|----------|--------------------|
| $J'$       | $K_a'$ | $K_c'$ | $J''$ | $K_a''$ | $K_c''$ | A-level                                        |                    | E-level            |          | A-level                                   |          |                    |
|            |        |        |       |         |         | Obsd                                           | O - C <sup>a</sup> | O - C <sup>b</sup> | Obsd     | O - C <sup>b</sup>                        | Obsd     | O - C <sup>a</sup> |
| 7          | 0      | 7      | 6     | 0       | 6       | 27469.98                                       | -0.09              | -0.09              |          |                                           |          |                    |
| 7          | 1      | 7      | 6     | 1       | 6       | 26683.35                                       | -0.24              | 0.23               |          |                                           |          |                    |
| 7          | 1      | 6      | 6     | 1       | 5       | 29104.60                                       | -0.07              | 0.03               |          |                                           |          |                    |
| 7          | 2      | 6      | 6     | 2       | 5       | 27950.89                                       | 0.23               | 0.28               | 27960.00 | 0.36                                      |          |                    |
| 7          | 2      | 5      | 6     | 2       | 4       | 28513.23                                       | -0.16              | -0.06              |          |                                           | 26795.55 | 0.06               |
| 7          | 3      | 5      | 6     | 3       | 4       | 28108.24                                       | 0.17               | 0.24               |          |                                           |          |                    |
| 7          | 3      | 4      | 6     | 3       | 3       | 28133.09                                       | -0.01              | 0.06               |          |                                           |          |                    |
| 7          | 4      | 4      | 6     | 4       | 3       | 28084.00                                       | -0.13              | -0.07              |          |                                           |          |                    |
| 7          | 5      | 3      | 6     | 5       | 2       | 28068.50                                       | 0.23               | 0.29               |          |                                           |          |                    |
| 7          | 6      | 2      | 6     | 6       | 1       | 28059.09                                       | -0.15              | -0.09              |          |                                           |          |                    |
| 8          | 0      | 8      | 7     | 0       | 7       | 31219.70                                       | -0.24              | -0.25              |          |                                           | 29365.05 | -0.05              |
| 8          | 1      | 8      | 7     | 1       | 7       | 30451.49                                       | -0.20              | -0.22              |          |                                           | 28668.02 | -0.03              |
| 8          | 1      | 7      | 7     | 1       | 6       | 33197.70                                       | -0.26              | -0.16              | 33197.00 | -0.54                                     | 31175.49 | 0.01               |
| 8          | 2      | 7      | 7     | 2       | 6       | 31908.20                                       | 0.17               | 0.21               | 31911.27 | -1.32                                     | 29998.36 | -0.10              |
| 8          | 2      | 6      | 7     | 2       | 5       | 32724.23                                       | -0.19              | -0.06              | 32719.90 | -0.17                                     | 30749.85 | -0.28              |
| 8          | 3      | 6      | 7     | 3       | 5       | 32139.50                                       | 0.26               | 0.34               |          |                                           | 30211.40 | 0.03               |
| 8          | 3      | 5      | 7     | 3       | 4       | 32189.09                                       | 0.07               | 0.15               |          |                                           | 30257.54 | -0.16              |
| 8          | 4      | 5      | 7     | 4       | 4       | 32110.28                                       | 0.20               | 0.90               |          |                                           | 30184.15 | 0.19               |
| 8          | 5      | 4      | 7     | 5       | 3       | 32086.20                                       | -0.08              | -0.02              |          |                                           | 30162.24 | -0.20              |
| 8          | 6      | 3      | 7     | 6       | 2       | 32073.16                                       | -0.03              | 0.03               |          |                                           | 30150.04 | -0.13              |
| 8          | 7      | 2      | 7     | 7       | 1       | 32064.76                                       | 0.05               | 0.11               |          |                                           | 30143.00 | 0.21               |
| 9          | 0      | 9      | 8     | 0       | 8       | 34923.47                                       | -0.14              | -0.19              |          |                                           | 32853.86 | 0.05               |
| 9          | 1      | 9      | 8     | 1       | 8       | 34206.30                                       | -0.10              | -0.14              |          |                                           | 32853.86 | -0.09              |
| 9          | 1      | 8      | 8     | 1       | 7       | 37261.32                                       | -0.07              | 0.03               | 37260.90 | 0.03                                      | 34992.79 | -0.28              |
| 9          | 2      | 8      | 8     | 2       | 7       | 35851.57                                       | 0.16               | 0.21               | 35853.64 | -0.16                                     | 33707.10 | 0.00               |
| 9          | 2      | 7      | 8     | 2       | 6       | 36966.40                                       | -0.20              | -0.05              | 36963.36 | -1.08                                     | 34733.15 | -0.08              |
| 9          | 3      | 7      | 8     | 3       | 6       | 36173.38                                       | 0.13               | 0.21               |          |                                           | 34003.51 | 0.09               |
| 9          | 3      | 6      | 8     | 3       | 5       | 36263.96                                       | 0.22               | 0.31               |          |                                           | 34087.54 | -0.09              |
| 9          | 5      | 5      | 8     | 5       | 4       | 36107.50                                       | -0.11              | -0.04              |          |                                           | 33943.10 | 0.19               |
| 9          | 6      | 4      | 8     | 6       | 3       | 36089.20                                       | -0.14              | -0.07              |          |                                           | 33925.95 | 0.11               |
| 9          | 7      | 3      | 8     | 7       | 2       | 36077.52                                       | -0.19              | -0.12              |          |                                           | 33914.91 | 0.07               |
| 9          | 8      | 2      | 8     | 8       | 1       | 36069.60                                       | 0.20               | 0.27               |          |                                           | 33907.06 | 0.20               |
| 10         | 0      | 10     | 9     | 0       | 9       | 38590.28                                       | 0.05               | -0.02              |          |                                           | 36309.14 | 0.07               |
| 10         | 1      | 10     | 9     | 1       | 9       | 37947.27                                       | -0.09              | -0.14              |          |                                           | 35728.32 | 0.00               |
| 10         | 1      | 9      | 9     | 1       | 8       | 41289.16                                       | 0.20               | 0.29               |          |                                           | 38777.77 | 0.05               |
| 10         | 2      | 9      | 9     | 2       | 8       |                                                |                    |                    |          |                                           | 37401.63 | 0.04               |
| 10         | 2      | 8      | 9     | 2       | 7       | 41228.57                                       | -0.08              | 0.10               |          |                                           | 38734.27 | 0.10               |
| 10         | 3      | 8      | 9     | 3       | 7       |                                                |                    |                    |          |                                           | 37796.83 | 0.04               |
| 10         | 3      | 7      | 9     | 3       | 6       |                                                |                    |                    |          |                                           | 37939.36 | -0.02              |
| 10         | 4      | 6      | 9     | 4       | 5       |                                                |                    |                    |          |                                           | 37771.65 | -0.24              |
| 10         | 5      | 6      | 9     | 5       | 5       | 40132.88                                       | 0.22               | 0.30               |          |                                           | 37727.14 | 0.17               |
| 10         | 6      | 5      | 9     | 6       | 4       | 40108.22                                       | 0.25               | 0.32               |          |                                           | 37703.87 | -0.08              |
| 10         | 7      | 4      | 9     | 7       | 3       | 40092.20                                       | -0.25              | -0.18              |          |                                           | 37689.25 | -0.08              |
| 10         | 8      | 3      | 9     | 8       | 2       | 40081.27                                       | -0.27              | -0.21              |          |                                           | 37678.74 | -0.19              |
| 10         | 9      | 2      | 9     | 9       | 1       | 40073.30                                       | 0.14               | 0.21               |          |                                           | 37669.30 | -0.25              |
| 11         | 0      | 1      | 10    | 0       | 10      |                                                |                    |                    |          |                                           | 39741.25 | 0.21               |

Table S1. (continued)

| Transition |                       |                       |            |                        |                        | CD <sub>3</sub> C(:O)NCO |                    |
|------------|-----------------------|-----------------------|------------|------------------------|------------------------|--------------------------|--------------------|
| <i>J'</i>  | <i>K<sub>a</sub>'</i> | <i>K<sub>c</sub>'</i> | <i>J''</i> | <i>K<sub>a</sub>''</i> | <i>K<sub>c</sub>''</i> | Obsd                     | O - C <sup>a</sup> |
| 11         | 1                     | 11                    | 10         | 1                      | 10                     | 39240.55                 | 0.24               |
| 15         | 1                     | 14                    | 15         | 0                      | 15                     | 35881.10                 | 0.40               |
| 9          | 2                     | 8                     | 9          | 1                      | 9                      | 30901.85                 | -0.17              |
| 10         | 2                     | 9                     | 10         | 1                      | 10                     | 32576.00                 | 0.11               |
| 11         | 2                     | 10                    | 11         | 1                      | 11                     | 34415.60                 | -0.06              |
| 17         | 2                     | 15                    | 17         | 1                      | 16                     | 28326.25                 | 0.23               |
| 18         | 2                     | 16                    | 18         | 1                      | 17                     | 31062.85                 | -0.28              |
| 19         | 2                     | 17                    | 19         | 1                      | 18                     | 34147.15                 | -0.26              |
| 20         | 2                     | 18                    | 20         | 1                      | 19                     | 37535.46                 | -0.28              |
| 13         | 3                     | 10                    | 13         | 2                      | 11                     | 33405.46                 | 0.00               |
| 14         | 3                     | 11                    | 14         | 2                      | 12                     | 32374.45                 | -0.02              |
| 15         | 3                     | 12                    | 15         | 2                      | 13                     | 31433.43                 | -0.11              |
| 16         | 3                     | 13                    | 16         | 2                      | 14                     | 30651.15                 | -0.07              |
| 17         | 3                     | 14                    | 17         | 2                      | 15                     | 30092.65                 | -0.05              |
| 18         | 3                     | 15                    | 18         | 2                      | 16                     | 29816.45                 | -0.15              |
| 19         | 3                     | 16                    | 19         | 2                      | 17                     | 29872.98                 | -0.17              |
| 20         | 3                     | 17                    | 20         | 2                      | 18                     | 30303.55                 | -0.22              |
| 21         | 3                     | 18                    | 21         | 2                      | 19                     | 31141.10                 | -0.14              |
| 22         | 3                     | 19                    | 22         | 2                      | 20                     | 32409.50                 | -0.20              |
| 23         | 3                     | 20                    | 23         | 2                      | 21                     | 34123.85                 | 0.09               |
| 24         | 3                     | 21                    | 24         | 2                      | 22                     | 36287.10                 | 0.29               |
| 25         | 3                     | 22                    | 25         | 2                      | 23                     | 38889.10                 | 0.22               |
| 25         | 4                     | 21                    | 25         | 3                      | 22                     | 39847.90                 | 0.28               |
| 26         | 4                     | 22                    | 26         | 3                      | 23                     | 39408.75                 | 0.05               |
| 27         | 4                     | 23                    | 27         | 3                      | 24                     | 39368.40                 | 0.15               |
| 28         | 4                     | 24                    | 28         | 3                      | 25                     | 39768.71                 | -0.17              |

a. Obsd. - Calcd. (Fitting for the *A*-state transition frequencies)b. Obsd. - Calcd. (Fitting for the *A*- and *E*-states transition frequencies)
